# Supplementary material
Source: Springer Nature journal article supplement (https://www.springermedizin.de/resource/supplementary/12883_2013_885_MOESM4_ESM.pdf/9456086)

**Trial sites**  
Blood collection

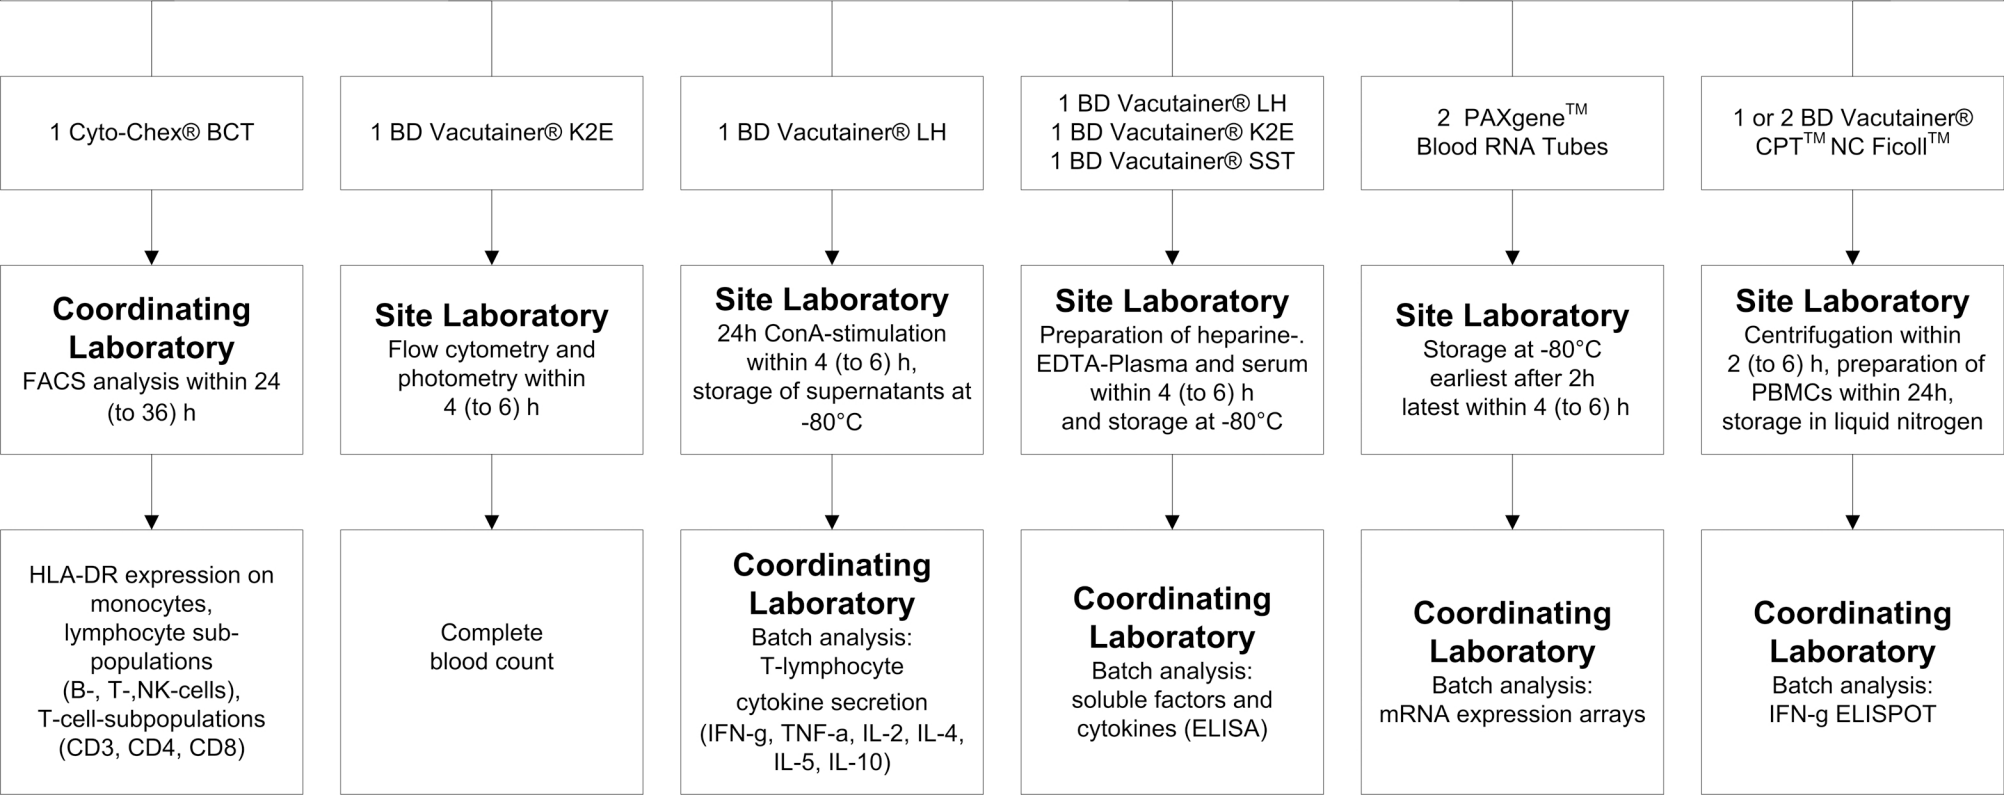

Supplement: MOESM4 [file 9456086]
